# Supplementary material
Source: PubMed Central journal article supplement (PMC3730746)
Supplement: NIHMS54182-supplement-02.pdf [file NIHMS54182-supplement-02.pdf]

Type of file: table

Label: Tables 1-6

Filename: DA\_SCZ\_metaanalysis\_suppl\_Tables\_1-6\_pre\_proofs.doc

The nature of dopamine dysfunction in schizophrenia and what this means for treatment. Howes OD, Kambeitz J, Kim E, Stahl D, Slifstein M, Abi-Dargham A, Kapur S. Arch Gen Psychiatry. 2012 Aug;69(8):776-86.

Supplementary tables 1-6.

**Supplementary table 1. Methodological characteristics of the studies of presynaptic dopaminergic function**

|                                        | Author                                   | PET Tracer                      | Imaging approach               | Radio-tracer delivery | Drugs administered prior to scanning             | Scanner Type                    | Resolution (FWHM mm) | Outcome Measure                | Reference region                        |
|----------------------------------------|------------------------------------------|---------------------------------|--------------------------------|-----------------------|--------------------------------------------------|---------------------------------|----------------------|--------------------------------|-----------------------------------------|
| Radiolabelled DOPA studies             | Reith et al 1994 <sup>1</sup>            | [ <sup>18</sup> F]Fluoro-L-DOPA | single scan                    | bolus                 | -                                                | PC-2048B; Scanditronix          | na                   | k <sub>3</sub>                 | cortex                                  |
|                                        | Hietala et al 1995 <sup>2</sup>          | [ <sup>18</sup> F]Fluoro-L-DOPA | single scan                    | bolus                 | -                                                | ECAT 931/08-12                  | na                   | k <sub>i</sub>                 | occipital cortex                        |
|                                        | Dao-Castellana et al 1997 <sup>3</sup>   | [ <sup>18</sup> F]Fluoro-L-DOPA | single scan                    | bolus                 | -                                                | ECAT-Siemens 953-B              | 6.26                 | k <sub>i</sub>                 | occipital cortex                        |
|                                        | Hietala et al 1999 <sup>4</sup>          | [ <sup>18</sup> F]Fluoro-L-DOPA | single scan                    | bolus                 | Carbidopa: 100 mg, 1.5h pre-scanning             | ECAT 931/08-12                  | na                   | k <sub>i</sub>                 | occipital cortex                        |
|                                        | Lindstroem et al 1999 <sup>5</sup>       | [ <sup>11</sup> C]DOPA          | single scan                    | bolus                 | -                                                | GEMS PC2048-15B                 | 5                    | k <sub>i</sub>                 | occipital cortex                        |
|                                        | Elkashef et al 2000 <sup>6</sup>         | [ <sup>18</sup> F]Fluoro-L-DOPA | single scan                    | bolus                 | Carbidopa: 150 mg amino acid infusion            | 2048-15B; Scanditronix          | 6.5                  | uptake ratio (striatum/ ref)   | occipital cortex                        |
|                                        | Meyer-Lindenberg et al 2002 <sup>7</sup> | [ <sup>18</sup> F]Fluoro-L-DOPA | single scan                    | bolus                 | Carbidopa: 100 mg                                | PC-2048-153; Scanditronix       | 6.5                  | k <sub>i</sub>                 | occipital cortex                        |
|                                        | McGowan et al 2004 <sup>8</sup>          | [ <sup>18</sup> F]Fluoro-L-DOPA | single scan                    | bolus                 | Carbidopa: 150 mg, Entacapone: 400 mg            | HR++/966 EXACT; CTI PET Systems | 4.8                  | k <sub>i</sub>                 | occipital cortex                        |
|                                        | Kumakura et al 2007 <sup>9</sup>         | [ <sup>18</sup> F]Fluoro-L-DOPA | single scan                    | bolus                 | Carbidopa: 2mg/kg, 1h pre-scanning               | ECAT EXACT 47, Siemens          | na                   | k <sub>in</sub> <sup>app</sup> | cerebellum                              |
|                                        | Nozaki et al 2009 <sup>10</sup>          | [ <sup>11</sup> C]DOPA          | single scan                    | bolus                 | -                                                | ECAT/EXACT HR; CTI-Siemens      | 7.5                  | k <sub>i</sub>                 | occipital cortex                        |
|                                        | Howes et al 2009 <sup>11</sup>           | [ <sup>18</sup> F]Fluoro-L-DOPA | single scan                    | bolus                 | Carbidopa: 150 mg, Entacapone: 400 mg            | HR++/966 EXACT; CTI PET Systems | 4.8                  | k <sub>i</sub>                 | cerebellum                              |
| Dopamine release (amphetamine) studies | Laruelle et al 1996 <sup>12</sup>        | [ <sup>123</sup> I]IBZM         | two scan (baseline and active) | bolus+ infusion       | active scan: 0.3 mg/kg amphetamine IV bolus      | PRISM 3000 Picker               | 11                   | ΔBP                            | occipital cortex                        |
|                                        | Breier et al 1997 <sup>13</sup>          | [ <sup>11</sup> C]Raclopride    | two scan (baseline and active) | bolus+ infusion       | active scan: 0.2 mg/kg amphetamine               | General Electric Advance        | 6                    | ΔBP                            | cerebellum                              |
|                                        | Abi-Dargham et al 1998 <sup>14</sup>     | [ <sup>123</sup> I]IBZM         | two scan (baseline and active) | bolus+ infusion       | active scan: 0.3 mg/kg amphetamine IV bolus      | PRISM 3000 Picker               | 11                   | ΔBP                            | occipital cortex                        |
|                                        | Laruelle et al 1999 <sup>15</sup>        | [ <sup>123</sup> I]IBZM         | two scan (baseline and active) | bolus+ infusion       | active scan: 0.3 mg/kg amphetamine IV bolus      | PRISM 3000 Picker               | 11                   | ΔBP                            | occipital cortex                        |
|                                        | Abi-Dargham et al 2009 <sup>16</sup>     | [ <sup>123</sup> I]IBZM         | two scan (baseline and active) | bolus+ infusion       | active scan: 0.3 mg/kg amphetamine IV bolus      | na                              | na                   | ΔBP                            | average of frontal and occipital cortex |
| Pre-dopa mine (AMPT)                   | Abi-Dargham et al 2000 <sup>17</sup>     | [ <sup>123</sup> I]IBZM         | two scan (baseline and active) | bolus+ infusion       | active scan: 8g AMPT <sup>1</sup> PO over 2 days | PRISM 3000 Picker               | 11                   | ΔBP                            | average of frontal and occipital cortex |

The nature of dopamine dysfunction in schizophrenia and what this means for treatment. Howes OD, Kambeitz J, Kim E, Stahl D, Slifstein M, Abi-Dargham A, Kapur S. Arch Gen Psychiatry. 2012 Aug;69(8):776-86.

Supplementary tables 1-6.

|  |                                  |                              |                                |                 |                                                                |                            |         |     |            |
|--|----------------------------------|------------------------------|--------------------------------|-----------------|----------------------------------------------------------------|----------------------------|---------|-----|------------|
|  | Kegeles et al 2010 <sup>18</sup> | [ <sup>11</sup> C]Raclopride | two scan (baseline and active) | bolus+ infusion | active scan: 12.9-16.9 mg/kg AMPPT <sup>1</sup> PO over 2 days | ECAT/EXACT HR; CTI-Siemens | 4.4/4.1 | ΔBP | cerebellum |
|--|----------------------------------|------------------------------|--------------------------------|-----------------|----------------------------------------------------------------|----------------------------|---------|-----|------------|

<sup>1</sup>alpha-methyl-*para*-tyrosine;  $K_3 (K_3^D)$ =relative activity of dopa decarboxylase,  $K_i$ =utilization rate constant of DOPA relative to a reference region;  $K_{in}^{app}$ =net blood-brain DOPA clearance, BP=binding potential, FWHM=full width half maximum

Supplementary table 2. Subject characteristics of the studies of presynaptic dopaminergic function

|                            | Authors                     | Controls  |                  | Patients  |                  |                        |                                  |                                                                           |                  |                                    |                                 |                                    |                                    |
|----------------------------|-----------------------------|-----------|------------------|-----------|------------------|------------------------|----------------------------------|---------------------------------------------------------------------------|------------------|------------------------------------|---------------------------------|------------------------------------|------------------------------------|
|                            |                             | N (m/f)   | Age mean (sd)/yr | N (m/f)   | Age mean (sd)/yr | Diagnosis <sup>1</sup> | Inclusion criteria for diagnosis | Exclusion criteria                                                        | Illness duration | Antipsychotic treatment            | Total symptom score (mean [sd]) | Positive symptom score (mean [sd]) | Negative symptom score (mean [sd]) |
| Radiolabelled DOPA studies | Reith et al 1994            | 13 (9/4)  | 36 (13)          | 5 (5/0)   | 38 (4)           | All SZ                 | DSM-III-R                        | na                                                                        | 14 years         | 4 naïve, 1 free for >3 years       | PANSS: 58 (na)                  | PANSS: 14 (3)                      | PANSS: 12 (2)                      |
|                            | Hietala et al 1995          | 8 (6/2)   | 27 (7)           | 7 (4/3)   | 26 (7)           | All SZ                 | DSM-III-R                        | na                                                                        | 24 months        | all drug naïve                     | PANSS: 81 (14)                  | na                                 | na                                 |
|                            | Dao-Castellana et al 1997   | 7 (na)    | 25 (5)           | 6 (na)    | 26 (9)           | All SZ                 | DSM-III-R                        | neurological/ severe somatic disorders, alcoholism, toxicomania           | 6 years          | 2 naïve, 4 free for ≥4 months      | PANSS: 94 (na)                  | PANSS: 21 (12)                     | PANSS: 33 (7)                      |
|                            | Hietala et al 1999          | 13 (8/5)  | 30.4 (9.4)       | 10 (4/6)  | 29.6 (8.8)       | 7 SZ, 3 SZD            | DSM-III-R                        | na                                                                        | 7 months         | All naïve                          | PANSS: 77.6 (na)                | na                                 | na                                 |
|                            | Lindstroem et al 1999       | 10 (8/2)  | na               | 12 (10/2) | 31 (na)          | All SZ                 | DSM-III-R                        | abnormality on CT, EEG or routine blood tests, positive urine drug screen | 31.08 months     | 10 naïve, 2 drug free for >2 years | na                              | na                                 | na                                 |
|                            | Elkashef et al 2000         | 13 (8/5)  | 34.6 (10.75)     | 19 (15/4) | 36.3 (na)        | All SZ                 | DSM-III-R                        | medical/ neurological disorders, alcohol or drug abuse                    | 17.3 years       | 10 taking drugs, 9 drug free       | na                              | na                                 | na                                 |
|                            | Meyer-Lindenberg et al 2002 | 6 (5/1)   | 34 (na)          | 6 (5/1)   | 35 (na)          | All SZ                 | DSM-III-R                        | na                                                                        | na               | all free for ≥6 weeks              | na                              | na                                 | na                                 |
|                            | McGowan et al 2004          | 12 (12/0) | 38.3 (7.1)       | 16 (16/0) | 39.9 (11.3)      | All SZ                 | DSM-IV                           | neurologic/serious physical illness, substance abuse                      | na               | All on long-term drug treatment    | CASH: 10.6 (na)                 | CASH: 4.2 (na)                     | CASH: 6.3 (na)                     |
|                            | Kumakura et al              | 15 (15/0) | 37.3 (6.4)       | 8         | 37.3 (6.3)       | All SZ                 | DSM-IV                           | psychoactive                                                              | na               | 3 naïve, 6 free for                | PANSS:                          | PANSS:                             | PANSS:                             |

The nature of dopamine dysfunction in schizophrenia and what this means for treatment. Howes OD, Kambeitz J, Kim E, Stahl D, Slifstein M, Abi-Dargham A, Kapur S. Arch Gen Psychiatry. 2012 Aug;69(8):776-86.

Supplementary tables 1-6.

|                                        | 2007                   |            |             | (8/0)     |             |        |        | medication                                                                                               |                 | ≥6 months                                        | 80.2 (4.7)                          | 15.4 (3.5)        | 23.6 (4.0)         |
|----------------------------------------|------------------------|------------|-------------|-----------|-------------|--------|--------|----------------------------------------------------------------------------------------------------------|-----------------|--------------------------------------------------|-------------------------------------|-------------------|--------------------|
|                                        | Nozaki et al 2009      | 20 (10/10) | 35.1 (9.5)  | 18 (10/8) | 35.6 (7.4)  | All SZ | DSM-IV | brain disease, substance abuse, or episode of mood disorder                                              | 26.4 months     | 14 naïve, 4 free                                 | PANSS: 79.2 (21.4)                  | PANSS: 22.6 (7.3) | PANSS: 17.1 (6.5)  |
|                                        | Howes et al 2009       | 12 (8/4)   | 24.3 (4.6)  | 7 (5/2)   | 36.0 (14.7) | All SZ | DSM-IV | neurologic/ medical illness, head injury, alcohol or drug abuse or dependence                            | na              | 2 naïve, 5 free for >8 weeks                     | PANSS: 61.7 (31.0)                  | PANSS: 17.0 (7.0) | PANSS: 16.1 (10.0) |
| Dopamine release (amphetamine) studies | Laruelle et al 1996    | 15 (14/1)  | 41 (2)      | 15 (14/1) | 42 (2)      | All SZ | DSM-IV | other DSM-IV axis I diagnosis, substance abuse or dependence, severe medical condition                   | 14 years        | all free (mean free period=192 days)             | BPRS: 37 (3)                        | PANSS: 16.1 (1.7) | PANSS: 14.9 (1.5)  |
|                                        | Breier et al 1997      | 12 (9/3)   | 29.2 (9.01) | 11 (8/3)  | 32.4 (9.95) | All SZ | DSM-IV | illegal drug dependence and/or significant drug abuse, severe head trauma, significant medical condition | 6.6 years       | 4 naïve, 7 free for >14 days                     | BPRS: 28.8 (7.2)                    | BPRS: 6.7 (2.8)   | na                 |
|                                        | Abi-Dargham et al 1998 | 15 (12/3)  | 40 (11)     | 15 (12/3) | 41 (9)      | All SZ | DSM-IV | other DSM-IV axis I diagnosis, substance abuse or dependence, severe medical conditions                  | 17 years (2 FE) | 2 naïve, 13 free                                 | BPRS: 44 (11)                       | PANSS: 18.5 (5.1) | PANSS: 19.6 (7.0)  |
|                                        | Laruelle et al 1999    | 36 (32/4)  | 40 (9)      | 34 (28/6) | 40 (9)      | All SZ | DSM-IV | other DSM-IV axis I diagnosis, substance abuse or dependence, severe medical conditions                  | na              | 7 naïve, 27 free for 104 days (mean)             | na                                  | PANSS: 17.5 (6.2) | PANSS: 16.8 (6.6)  |
|                                        | Abi-Dargham et al 2009 | 8 (6/2)    | 28 (8)      | 6 (4/2)   | 28 (8)      | All SZ | DSM-IV | Na                                                                                                       | FE              | all drug naïve                                   | na                                  | na                | na                 |
| Synaptic dopamine (AMPT) studies       | Abi-Dargham et al 2000 | 18 (11/7)  | 31 (8)      | 18 (11/7) | 31 (8)      | All SZ | DSM-IV | other DSM-IV axis I diagnosis, substance abuse or dependence, severe medical conditions                  | na              | 8 naïve, 10 free for 139 days (mean)             | PANSS: FE: 71 (12) Chronic: 63 (11) | PANSS: 18.2 (6)   | PANSS: 13.8 (5.4)  |
|                                        | Kegeles et al 2010     | 18 (13/5)  | 29 (7)      | 18 (13/5) | 29 (8)      | All SZ | DSM-IV | weight <50kg or >115kg, other DSM-IV axis I diagnosis, substance abuse or                                | na              | 6 naïve, 4 free for ≥1 year, 8 free for ≥20 days | PANSS: 78.6 (20.6)                  | PANSS: 21.7 (7.1) | PANSS: 17.1 (5.9)  |

The nature of dopamine dysfunction in schizophrenia and what this means for treatment. Howes OD, Kambeitz J, Kim E, Stahl D, Slifstein M, Abi-Dargham A, Kapur S. Arch Gen Psychiatry. 2012 Aug;69(8):776-86.

Supplementary tables 1-6.

|  |  |  |  |  |  |  |  |                                          |  |  |  |  |  |
|--|--|--|--|--|--|--|--|------------------------------------------|--|--|--|--|--|
|  |  |  |  |  |  |  |  | dependence, severe<br>medical conditions |  |  |  |  |  |
|--|--|--|--|--|--|--|--|------------------------------------------|--|--|--|--|--|

<sup>1</sup>SZ=schizophrenia, SZD=schizo-affective disorder

<sup>2</sup>merged patient sample including antipsychotic untreated and treated patients

<sup>3</sup>no significant difference between number of smokers in healthy and patients group

<sup>4</sup>includes all subjects from Laruelle et al. (1996), Abi-Dargahm et al. (1998) and 10 new subjects

<sup>5</sup>The AMPT data for these subjects is reported in Abi-Dargham et al. (2000)

AMPT=alpha-methyl-*para*-tyrosine, PANSS=Positive And Negative Syndrome Scale, FE=first episode of psychosis, BPRS=Brief Psychiatric Rating Scale, CASH=Comprehensive Assessment of Symptoms and History, Chronic=multiple episode of psychosis, DSM=Diagnostic and Statistical Manual

The nature of dopamine dysfunction in schizophrenia and what this means for treatment. Howes OD, Kambeitz J, Kim E, Stahl D, Slifstein M, Abi-Dargham A, Kapur S. Arch Gen Psychiatry. 2012 Aug;69(8):776-86.

Supplementary tables 1-6.

**Supplementary table 3. Methodological characteristics of the studies of dopamine transporter availability**

| Author                            | PET Tracer                   | Radiotracer delivery | Scanner Type                       | Resolution (FWHM mm) | Outcome Measure     | Reference region |
|-----------------------------------|------------------------------|----------------------|------------------------------------|----------------------|---------------------|------------------|
| Arakawa et al 2009 <sup>19</sup>  | [ <sup>11</sup> C]PE2I       | bolus                | ECAT EXACT HR+                     | Na                   | BP <sub>ND</sub>    | Cerebellum       |
| Hisao et al 2003 <sup>20</sup>    | [ <sup>99m</sup> Tc]TRODAT-1 | bolus                | Siemens Multi-SPECT 3              | Na                   | BP <sub>ND</sub>    | occipital cortex |
| Laakso et al 2000 <sup>21</sup>   | [ <sup>18</sup> F]CFT        | bolus                | ECAT 931/08-12(CTI)                | Na                   | BP <sub>ND</sub>    | Cerebellum       |
| Lavalaye et al 2001 <sup>22</sup> | [ <sup>18</sup> F]CFT        | bolus                | ECAT 931/08-12(CTI)                | Na                   | BP <sub>ND</sub>    | Cerebellum       |
| Laruelle et al 2000 <sup>23</sup> | [ <sup>123</sup> I]β-CIT     | bolus                | Picker PRISM 3000                  | 9-11                 | BP <sub>ND</sub> +1 | occipital cortex |
| Lavalaye et al 2001 <sup>22</sup> | [ <sup>123</sup> I]FP-CIT    | bolus                | Na                                 | 7.6                  | BP <sub>ND</sub>    | occipital cortex |
| Mateos et al 2005 <sup>24</sup>   | [ <sup>123</sup> I]FP-CIT    | bolus                | Helix, G.E.M.S.                    | 10                   | BP <sub>ND</sub> +1 | occipital cortex |
| Mateos et al 2007 <sup>25</sup>   | [ <sup>123</sup> I]FP-CIT    | bolus                | Helix, G.E.M.S.                    | 10                   | BP <sub>ND</sub> +1 | occipital cortex |
| Yang et al 2004 <sup>26</sup>     | [ <sup>99m</sup> Tc]TRODAT-1 | bolus                | GE Sigma CV-I                      | Na                   | BP <sub>ND</sub> +1 | cerebellum       |
| Yoder et al 2004 <sup>27</sup>    | [ <sup>11</sup> C]β-CFT      | bolus                | Siemens ECAT 951R, EXACT HR+ (CTI) | Na                   | BP <sub>ND</sub>    | cerebellum       |
| Schmitt et al 2008 <sup>28</sup>  | [ <sup>99m</sup> Tc]TRODAT-1 | bolus                | Picker PRISM 3000                  | Na                   | BP <sub>ND</sub>    | cerebellum       |

The nature of dopamine dysfunction in schizophrenia and what this means for treatment. Howes OD, Kambeitz J, Kim E, Stahl D, Slifstein M, Abi-Dargham A, Kapur S. Arch Gen Psychiatry. 2012 Aug;69(8):776-86.

Supplementary tables 1-6.

Supplementary table 4. Subject characteristics of the studies of dopamine transporter availability

| Authors             | Controls  |                  | Patients  |                  |                        |                               |                                                                                                                   |                  |                                                 |                                 |                                                             |                                                             |
|---------------------|-----------|------------------|-----------|------------------|------------------------|-------------------------------|-------------------------------------------------------------------------------------------------------------------|------------------|-------------------------------------------------|---------------------------------|-------------------------------------------------------------|-------------------------------------------------------------|
|                     | N (m/f)   | Age mean (sd)/yr | N (m/f)   | Age mean (sd)/yr | Diagnosis <sup>1</sup> | Diagnostic inclusion criteria | Exclusion Criteria                                                                                                | Illness duration | Antipsychotic treatment                         | Total symptom score (mean [sd]) | Positive symptom score (mean [sd])                          | Negative symptom score (mean [sd])                          |
| Arakawa et al 2009  | 12 (10/2) | 33.2 (12.0)      | 8 (6/2)   | 36.5 (9.5)       | All SZ                 | DSM-IV                        | substance abuse, brain disease or epilepsy                                                                        | 32.1 months      | 6 naïve, 2 free for >6 months                   | PANSS: 77.8 (18.8)              | PANSS: 17.8 (4.8)                                           | PANSS: 18.9 (6.5)                                           |
| Hisao et al 2003    | 12 (2/10) | 29.8 (8.6)       | 12 (2/10) | 25.9 (7.7)       | All SZ                 | DSM-IV                        | age <16 or >45 years old, other DSM-IV axis I diagnosis, substance abuse or dependence, severe medical conditions | 0.8 years        | 12 naïve                                        | na                              | na                                                          | Na                                                          |
| Laakso et al 2000   | 9 (6/3)   | 29.9 (5.6)       | 9 (6/3)   | 30.1 (7.0)       | All SZ                 | DSM-III-R                     | Na                                                                                                                | 9 months         | 9 naïve                                         | na                              | na                                                          | Na                                                          |
| Lavalaye et al 2001 | 8 (na)    | 35.3 (5.7)       | 8 (na)    | 37.1 (5.7)       | All SZ                 | DSM-IV                        | Na                                                                                                                | 119 months       | All on AP Tx.                                   | na                              | na                                                          | Na                                                          |
| Laruelle et al 2000 | 22 (20/2) | 39.0 (8.0)       | 24 (22/2) | 41.0 (8.0)       | All SZ                 | DSM-IV                        | age <18 or >55 years old, other DSM-IV axis I diagnosis, substance abuse or dependence, severe medical conditions | 15 years         | 8 free for mean (sd)=18 (11) days, 16 on AP Tx. | na                              | na                                                          | Na                                                          |
| Lavalaye et al 2001 | 10 (7/3)  | 20.3 (0.5)       | 10 (9/1)  | 22.1 (3.7)       | 9 SZ, 1 SZD            | DSM-IV                        | Na                                                                                                                | 33.5 months      | 10 naïve                                        | na                              | PANSS: 22.8 (3.8)                                           | PANSS: 18.9 (6.7)                                           |
| Mateos et al 2005   | 10 (6/4)  | 27.0 (4.3)       | 20 (14/6) | 26.0 (4.8)       | All SZ                 | DSM-IV                        | CNS medications, CNS disorder, bipolar disorder, substance dependence                                             | 4.5 months       | All on AP Tx.*                                  | na                              | PANSS: 27.8(5.3) <sup>#</sup><br>27.4(4.5) <sup>§</sup>     | PANSS: 25.8 (4.3) <sup>#</sup><br>24.4 (7.3) <sup>§</sup>   |
| Mateos et al 2007   | 15 (8/7)  | 29.0 (7.0)       | 20 (14/6) | 26.0 (5.0)       | All SZ                 | DSM-IV                        | CNS medication, CNS disorder, bipolar disorder, substance dependence, positive drug screen (except for cannabis)  | 4 months         | 20 naïve*                                       | na                              | PANSS: 28.25(9.43) <sup>#</sup><br>30.75(3.84) <sup>§</sup> | PANSS: 22.63(6.50) <sup>#</sup><br>24.17(8.71) <sup>§</sup> |
| Yang et al 2004     | 12 (9/3)  | 33.3 (12.9)      | 11 (6/5)  | 26.3 (10.2)      | All SZ                 | DSM-IV                        | any medical or CNS diseases/head injury, antipsychotic, ECT, or lithium treatment, substance dependence           | 1.3 years        | 11 naïve                                        | PANSS: 63.8 (10.8)              | na                                                          | Na                                                          |
| Yoder et al 2004    | 10 (7/3)  | 45.0 (18.3)      | 10 (8/2)  | 40.5 (na)        | All SZ                 | DSM-IV                        | Na                                                                                                                | na               | 1 naïve, 1 free for 1 month, 8 on AP Tx         | na                              | na                                                          | Na                                                          |
| Schmitt et al       | 12 (9/3)  | 30.5 (7.98)      | 20 (18/2) | 29.3 (6.51)      | All SZ                 | DSM-IV/ICD-10                 | neuroleptic or antidepressant treatment, alcohol or illegal drug                                                  | na               | 20 naïve                                        | na                              | PANSS: 30.65 (7.65)                                         | PANSS: 29.50 (6.45)                                         |

The nature of dopamine dysfunction in schizophrenia and what this means for treatment. Howes OD, Kambeitz J, Kim E, Stahl D, Slifstein M, Abi-Dargham A, Kapur S. Arch Gen Psychiatry. 2012 Aug;69(8):776-86.

Supplementary tables 1-6.

|      |  |  |  |  |  |                        |  |  |  |  |
|------|--|--|--|--|--|------------------------|--|--|--|--|
| 2008 |  |  |  |  |  | abuse, CNS comorbidity |  |  |  |  |
|------|--|--|--|--|--|------------------------|--|--|--|--|

SZD=schizo-affective disorder, CNS=central nervous system; \*Patients were grouped by whether they showed antipsychotic-induced parkinsonism (#) or not (°) at the point of scanning or, in the case of antipsychotic naïve patients, to subsequent antipsychotic treatment

**Supplementary table 5. Methodological characteristics of the studies of dopamine receptor availability**

|                       | Author                             | PET Tracer                        | Radiotracer delivery | Scanner Type             | Resolution (FWHM mm) | Outcome Measure     | Reference region |
|-----------------------|------------------------------------|-----------------------------------|----------------------|--------------------------|----------------------|---------------------|------------------|
| <b>Butyrophenones</b> | Crawley et al 1986 <sup>29</sup>   | [ <sup>76</sup> Br]Bromospiperone | Bolus                | IGE 400AT gamma camera   | Na                   | BP <sub>ND</sub> +1 | Cerebellum       |
|                       | Martinot et al 1990 <sup>30</sup>  | [ <sup>76</sup> Br]Bromospiperone | Bolus                | LETI TTVO1               | Na                   | BP <sub>ND</sub> +1 | Cerebellum       |
|                       | Tune et al 1993 <sup>31</sup>      | [ <sup>11</sup> C]NMSP            | Bolus                | NeuroECAT PET            | Na                   | B <sub>max</sub>    | Cerebellum       |
|                       | Nordström et al 1995 <sup>32</sup> | [ <sup>11</sup> C]NMSP            | Bolus                | Scanditronix PC 2048-15B | Na                   | B <sub>max</sub>    | Cerebellum       |
|                       | Okubo et al 1997 <sup>33</sup>     | [ <sup>11</sup> C]NMSP            | Bolus                | PCT3600W40               | Na                   | k <sub>3</sub>      | Cerebellum       |
| <b>Benzamides</b>     | Farde et al 1990 <sup>34</sup>     | [ <sup>11</sup> C]Raclopride      | Bolus                | PC-384-7B                | Na                   | B <sub>max</sub>    | Cerebellum       |
|                       | Hietala et al 1994 <sup>35</sup>   | [ <sup>11</sup> C]Raclopride      | Bolus                | ECAT 931/08-12           | Na                   | B <sub>max</sub>    | Cerebellum       |
|                       | Breier et al 1997 <sup>13</sup>    | [ <sup>11</sup> C]Raclopride      | bolus+ infusion      | GE Advance scanner       | Na                   | BP <sub>ND</sub>    | Cerebellum       |
|                       | Talvik et al 2006 <sup>36</sup>    | [ <sup>11</sup> C]Raclopride      | Bolus                | ECAT EXACT 47            | 4                    | BP <sub>ND</sub>    | Cerebellum       |
|                       | Kegeles et al 2010 <sup>18</sup>   | [ <sup>11</sup> C]Raclopride      | bolus+               | ECAT EXACT HR+           | 4.1                  | BP <sub>ND</sub>    | Cerebellum       |



The nature of dopamine dysfunction in schizophrenia and what this means for treatment. Howes OD, Kambeitz J, Kim E, Stahl D, Slifstein M, Abi-Dargham A, Kapur S. Arch Gen Psychiatry. 2012 Aug;69(8):776-86.

Supplementary tables 1-6.

|                   |                                      |                                  |                  |                             |      |                     |                                          |
|-------------------|--------------------------------------|----------------------------------|------------------|-----------------------------|------|---------------------|------------------------------------------|
|                   |                                      |                                  | infusion         |                             |      |                     |                                          |
|                   | Pilowsky et al 1994 <sup>37</sup>    | [ <sup>123</sup> I]IBZM          | Bolus            | SME 810 SPECT brain scanner | 7-9  | BP <sub>ND</sub> +1 | frontal cortex                           |
|                   | Pedro et al 1994 <sup>38</sup>       | [ <sup>123</sup> I]IBZM          | Bolus            | SME 810 SPECT brain scanner | na   | BP <sub>ND</sub> +1 | frontal cortex                           |
|                   | Laruelle et al 1996 <sup>12</sup>    | [ <sup>123</sup> I]IBZM          | bolus + infusion | PRISM 3000                  | 11   | BP <sub>f</sub>     | occipital cortex                         |
|                   | Knable et al 1997                    | [ <sup>123</sup> I]IBZM          | Bolus            | CERASPECT                   | 11.5 | BP <sub>ND</sub>    | occipital cortex                         |
|                   | Abi-Dargham et al 1998 <sup>14</sup> | [ <sup>123</sup> I]IBZM          | bolus + infusion | PRISM 3000                  | 11   | BP <sub>f</sub>     | occipital cortex                         |
|                   | Yang et al 2004 <sup>26</sup>        | [ <sup>123</sup> I]IBZM          | Bolus            | Na                          | Na   | BP <sub>ND</sub> +1 | Cerebellum                               |
|                   | Corripio et al 2006 <sup>39</sup>    | [ <sup>123</sup> I]IBZM          | Bolus            | Helix, GEMS                 | Na   | BP <sub>ND</sub> +1 | occipital cortex                         |
|                   | Abi-Dargham et al 2000 <sup>17</sup> | [ <sup>123</sup> I]IBZM          | bolus + infusion | PRISM 3000 XP               | 11   | BP <sub>ND</sub>    | average of frontal and occipital regions |
|                   | Schmitt et al 2009 <sup>40</sup>     | [ <sup>123</sup> I]IBZM          | Bolus            | PRISM 3000 XP               | Na   | BP <sub>ND</sub>    | frontal cortex                           |
|                   | Kessler et al 2009 <sup>41</sup>     | [ <sup>18</sup> F]Fallypride     | Bolus            | GE Advance scanner          | Na   | BP <sub>ND</sub>    | Cerebellum                               |
|                   | Kegeles et al 2010 <sup>42</sup>     | [ <sup>18</sup> F]Fallypride     | Bolus            | ECAT EXACT HR+              | Na   | BP <sub>ND</sub>    | Cerebellum                               |
| Ergot derivatives | Martinot et al 1991 <sup>43</sup>    | [ <sup>76</sup> Br]Bromolisuride | Bolus            | LETI TTVO1                  | Na   | BP <sub>ND</sub> +1 | Cerebellum                               |
|                   | Martinot et al 1994 <sup>44</sup>    | [ <sup>76</sup> Br]Bromolisuride | Bolus            | LETI TTVO1                  | na   | BP <sub>ND</sub> +1 | Cerebellum                               |

FWHM=full width half maximum

The nature of dopamine dysfunction in schizophrenia and what this means for treatment. Howes OD, Kambeitz J, Kim E, Stahl D, Slifstein M, Abi-Dargham A, Kapur S. Arch Gen Psychiatry. 2012 Aug;69(8):776-86.

Supplementary tables 1-6.

Supplementary table 6. Subject characteristics of the studies of dopamine receptor availability

| Method         | Authors              | Controls   |                  | Patients  |                  |                        |                               |                                                                                              |                                       |                                 |                                 |                                    |                                          |
|----------------|----------------------|------------|------------------|-----------|------------------|------------------------|-------------------------------|----------------------------------------------------------------------------------------------|---------------------------------------|---------------------------------|---------------------------------|------------------------------------|------------------------------------------|
|                |                      | N (m/f)    | Age mean (sd)/yr | N (m/f)   | Age mean (sd)/yr | Diagnoses <sup>1</sup> | Diagnostic inclusion criteria | Exclusion Criteria                                                                           | Illness duration (mean unless stated) | Antipsychotic treatment         | Total symptom score (mean [sd]) | Positive symptom score (mean [sd]) | Negative symptom score (mean [sd])       |
| Butyrophenones | Crawley et al 1986   | 13 (11/2)  | 41.2 (10.3)      | 12 (10/2) | 44.3 (18.2)      | 11 SZ, 1 PD            | na                            | Na                                                                                           | 13.4 years                            | 4 naïve, 8 free for ≥ 4 months  | na                              | na                                 | Na                                       |
|                | Martinot et al 1990  | 12 (na)    | 28.7 (10.3)      | 12 (12/0) | 28.7 (8.7)       | All SZ                 | DSM-III                       | age<18 year, female, patient unable to remain medication free for a week prior to scan       | na                                    | 9 naïve, 3 free for > 1 year    | na                              | CPRS: 42.6 (29.8)                  | CPRS: 57.6 (25.1)                        |
|                | Tune et al 1993      | 17 (13/4)  | 39 (5.93)        | 25 (17/8) | 34.88 (7.08)     | All SZ                 | DSM-III-R                     | stroke, mental retardation, significant head trauma, seizure disorder, past ECT, stroke      | 8.16 years                            | 18 naïve, 7 free for ≥ 4 months | BPRS: 47.2 (5.9)                | BPRS: 13.0 (0.94)                  | BPRS: 7.08 (0.61)<br>SANS: 37.79 (22.66) |
|                | Nordström et al 1995 | 7 (7/0)    | 27.7 (6.8)       | 7 (5/2)   | 28.4 (5.7)       | 4 SZ, 3 SZD            | DSM-III-R                     | physically healthy/history of organic brain disorder, head injury, alcohol or drug abuse     | ≥ 2 months                            | 7 naïve                         | BPRS: 33 (4)                    | na                                 | Na                                       |
|                | Okubo et al 1997     | 18 (na)    | 27.7 (5.6)       | 17 (na)   | 27.4 (5.9)       | All SZ                 | ICD-10                        | Na                                                                                           | ≥ 4 months                            | 10 naïve, 7 free for ≥ 2 weeks  | na                              | na                                 | Na                                       |
| Benzamides     | Farde et al 1990     | 20 (10/10) | 27.5 (4.9)       | 18 (10/8) | 24.2 (3.3)       | All SZ                 | DSM-III                       | organic brain disorder/ head injury, drug or alcohol abuse,                                  | Median: 10 months <sup>#</sup>        | 18 naïve                        | CPRS subscale: 12.0 (3.7)       | na                                 | Na                                       |
|                | Hietala et al 1994   | 10 (6/4)   | 26.8 (7.3)       | 13 (9/4)  | 25.2 (6.8)       | All SZ                 | DSM-III-R                     | long-term intensive psychotherapy, serious somatic illness                                   | 18.7 months                           | 13 naïve                        | BPRS: 51.4 (18.9)               | na                                 | Na                                       |
|                | Breier et al 1997    | 12 (9/3)   | 29.2 (SE:2.6)    | 11 (8/3)  | 32.4 (SE:3.0)    | All SZ                 | DSM-IV                        | drug dependence or significant drug abuse, severe head trauma, significant medical condition | 6.6 years                             | 6 naïve, 5 free for ≥ 14 days   | BPRS: 28.8 (7.2)                | na                                 | Na                                       |
|                | Pilowsky et al 1994  | 20 (11/9)  | 31.0 (7.8)       | 20 (11/9) | 31.0 (8.5)       | All SZ                 | DSM-III-R                     | primary substance use disorder, serious physical illness                                     | 36 months                             | 17 naïve, 3 free for > 5 years  | na                              | na                                 | Na                                       |
|                | Pedro et al 1994     | 15 (9/6)   | 33 (na)          | 12 (6/6)  | 33.5 (9.7)       | All SZ                 | DSM-III-R                     | primary substance use disorder, serious physical illness                                     | 4.02 years                            | 10 naïve, 2 free for ≥ 6 months | BPRS: 56.3 (10.2)               | BPRS: 22.25 (7.07)                 | BPRS: 8.5 (5)                            |
|                | Laruelle et al 1996  | 15 (14/1)  | 41 (SE: 2)       | 15 (14/1) | 42 (SE:2)        | All SZ                 | DSM-IV                        | other DSM-IV axis I diagnosis, substance abuse                                               | 14 years                              | 1 naïve, 14 free for ≥21 days   | BPRS: 37(3)                     | PANSS: 16.6 (1.7)                  | PANSS: 14.9 (1.5)                        |

The nature of dopamine dysfunction in schizophrenia and what this means for treatment. Howes OD, Kambeitz J, Kim E, Stahl D, Slifstein M, Abi-Dargham A, Kapur S. Arch Gen Psychiatry. 2012 Aug;69(8):776-86.

Supplementary tables 1-6.

|                   |                        |           |               |           |                             |                    |                     |                                                                                                                 |            |                                      |                                          |                     |                     |
|-------------------|------------------------|-----------|---------------|-----------|-----------------------------|--------------------|---------------------|-----------------------------------------------------------------------------------------------------------------|------------|--------------------------------------|------------------------------------------|---------------------|---------------------|
|                   |                        |           |               |           |                             |                    |                     | or dependence, severe medical condition                                                                         |            |                                      |                                          |                     |                     |
|                   | Knable et al 1997~     | 16 (11/5) | 28.8 (7.8)    | 21 (18/3) | 35.8 (9.0)                  | 19 SZ, 2 SZD       | DSM-IV              | Na                                                                                                              | 14.5 years | 1 naïve, 20 free for mean=25.6 days~ | na                                       | na                  | na                  |
|                   | Abi-Dargham et al 1998 | 15 (12/3) | 40 (11)       | 15 (12/3) | 41 (9)                      | All SZ             | DSM-IV              | other DSM-IV axis I diagnosis, substance abuse or dependence, severe medical conditions                         | 17 years   | 2 naïve, 13 free for ≥22 days        | BPRS: 44 (11)                            | PANSS: 18.5 (5.1)   | PANSS: 19.6 (7.0)   |
|                   | Abi-Dargham et al 2000 | 18 (11/7) | 31 (8)        | 18 (11/7) | 31 (8)                      | All SZ             | DSM-IV              | other DSM-IV axis I diagnosis, substance abuse or dependence, severe medical conditions                         | na         | 8 naïve, 10 free for 139 days (mean) | PANSS: 71 (12) (naïve)<br>63 (11) (free) | na                  | na                  |
|                   | Yang et al 2004        | 12 (9/3)  | 33.26 (12.93) | 11 (6/5)  | 26.25 (10.22)               | All SZ             | DSM-IV              | medical/ neurological diseases, ECT, lithium treatment, alcohol or substance dependence, or head injury         | 1.3 years  | 11 naïve                             | PANSS: 63.8 (10.8)                       | na                  | na                  |
|                   | Corripio et al 2006    | 18 (10/8) | 24.2 (4.4)    | 11 (6/5)  | 25.6 (4.5)                  | All SZ             | DSM-IV              | substance abuse, neurological disease                                                                           | na         | 11 naïve                             | PANSS: 71.1(11.4)                        | na                  | na                  |
|                   | Talvik et al 2006      | 17 (13/4) | Na            | 18 (9/9)  | 28.8 (10.5)                 | All SZ             | DSM-IV              | psychiatric comorbidity, head injury, drug addiction                                                            | ≥ 1 year   | 18 naïve                             | PANSS: 80.4 (20.9)                       | PANSS: 21.9 (4.6)   | PANSS: 20.1(9.6)    |
|                   | Schmitt et al 2009     | 10 (5/5)  | 32.4 (12.73)  | 23 (19/4) | 28.2 (6.23)                 | 19 SZ, 2 SZD, 2 BP | DSM-IV/ICD-10       | na                                                                                                              | na         | 23 naïve                             | BPRS: 73.6 (na)                          | PANSS: 29.1 (na)    | PANSS: 29.1 (na)    |
|                   | Kessler et al 2009     | 11 (5/6)  | 31.6 (9.2)    | 11 (6/5)  | 30.5 (8.0)                  | All SZ             | DSM-IV              | significant medical conditions, substance abuse                                                                 | na         | 4 naïve, 7 free for ≥ 3 weeks        | BPRS (6 item scale): 28.8 (7.0)          | SAPS: 9.8 (3.1)     | SANS: 9.4 (4.0)     |
|                   | Kegeles et al 2010     | 18 (13/5) | 29 (7)        | 18 (13/5) | 29 (8)                      | All SZ             | DSM-IV              | weight <50kg or> 115kg, other DSM-IV axis I diagnosis, substance abuse or dependence, severe medical conditions | na         | 6 naïve, 12 free for ≥ 20 days       | PANSS: 78.61 (20.63)                     | PANSS: 21.72 (7.12) | PANSS: 17.17 (5.99) |
|                   | Kegeles et al 2010     | 22 (17/5) | 26 (6)        | 21 (14/7) | 31 (12)                     | All SZ             | DSM-IV              | medical illness, other DSM-IV Axis I diagnosis, substance abuse                                                 | na         | 5 naïve, 16 free for 191 days (mean) | PANSS: 64 (15)                           | na                  | na                  |
| Ergot derivatives | Martinot et al 1991    | 14 (14/0) | 23 (4)        | 19 (12/7) | Men: 22(4)<br>Female: 24(6) | All SZ             | DSM-III             | age <18 years old, schizophrenic disorder, unable to remain medication free for 1 week before scan              | na         | 10 naïve, 9 free for ≥ 6 months      | na                                       | na                  | na                  |
|                   | Martinot et al 1994    | 10 (na)   | 21 (2)        | 10 (na)   | 20 (2)                      | All SZ             | DSM-III-R:undiffer- | Age<18 or >25 years old, marked positive symptoms,                                                              | na         | 8 naïve, 2 free for ≥ 4 months       | na                                       | SAPS: 19.1 (13.8)   | SANS: 87.2 (14.2)   |

The nature of dopamine dysfunction in schizophrenia and what this means for treatment. Howes OD, Kambeitz J, Kim E, Stahl D, Slifstein M, Abi-Dargham A, Kapur S. Arch Gen Psychiatry. 2012 Aug;69(8):776-86.

Supplementary tables 1-6.

|  |  |  |  |  |  |  |                                                              |                                                                                                          |  |  |  |  |
|--|--|--|--|--|--|--|--------------------------------------------------------------|----------------------------------------------------------------------------------------------------------|--|--|--|--|
|  |  |  |  |  |  |  | entiated/di-<br>sorganised<br>sub-types,<br>SANS<br>score>55 | lifetime neuroleptic<br>exposure >1 month, unable<br>to remain medication free<br>for 1 week before scan |  |  |  |  |
|--|--|--|--|--|--|--|--------------------------------------------------------------|----------------------------------------------------------------------------------------------------------|--|--|--|--|

PD: Psychotic depression; SZD: Schizo-affective disorder; BP: Brief Psychotic disorder; CPRS: Comprehensive Psychopathological Rating Scale; BPRS: Brief Psychiatric Rating Scale; PANSS: Positive And Negative Syndrome Scale; SAPS: Scale for the Assessment of Positive Symptoms; SANS: Scale for the Assessment of Negative Symptoms; ECT=electro-convulsive therapy

#=mean duration of illness was 1.9 years including the prodrome to the first psychotic episode, range: 1-72 months<sup>45</sup>; ~excluded from the main analysis because the antipsychotic wash-out 7 days in some patients

#### References:

1. Reith, J., *et al.* Elevated dopa decarboxylase activity in living brain of patients with psychosis. *Proc.Natl.Acad.Sci U.S.A* **91**, 11651-11654 (1994).
2. Hietala, J., *et al.* Presynaptic dopamine function in striatum of neuroleptic-naive schizophrenic patients. *Lancet* **346**, 1130-1131 (1995).
3. Dao-Castellana, M.H., *et al.* Presynaptic dopaminergic function in the striatum of schizophrenic patients. *Schizophr.Res* **23**, 167-174 (1997).
4. Hietala, J., *et al.* Depressive symptoms and presynaptic dopamine function in neuroleptic-naive schizophrenia. *Schizophr.Res* **35**, 41-50 (1999).
5. Lindstrom, L.H., *et al.* Increased dopamine synthesis rate in medial prefrontal cortex and striatum in schizophrenia indicated by L-(beta-11C) DOPA and PET. *Biol.Psychiatry* **46**, 681-688 (1999).
6. Elkashef, A.M., *et al.* 6-(18)F-DOPA PET study in patients with schizophrenia. Positron emission tomography. *Psychiatry Res* **100**, 1-11 (2000).
7. Meyer-Lindenberg, A., *et al.* Reduced prefrontal activity predicts exaggerated striatal dopaminergic function in schizophrenia. *Nat.Neurosci.* **5**, 267-271 (2002).
8. McGowan, S., Lawrence, A.D., Sales, T., Queded, D. & Grasby, P. Presynaptic dopaminergic dysfunction in schizophrenia: a positron emission tomographic [18F]fluorodopa study. *Arch.Gen.Psychiatry* **61**, 134-142 (2004).
9. Kumakura, Y., *et al.* Elevated [18F]fluorodopamine turnover in brain of patients with schizophrenia: an [18F]fluorodopa/positron emission tomography study. *J Neurosci.* **27**, 8080-8087 (2007).
10. Nozaki, S., *et al.* Regional dopamine synthesis in patients with schizophrenia using L-[beta-(11)C]DOPA PET. *Schizophr.Res* **108**, 78-84 (2009).
11. Howes, O.D., *et al.* Elevated striatal dopamine function linked to prodromal signs of schizophrenia. *Arch Gen Psychiatry* **66**, 13-20 (2009).
12. Laruelle, M., *et al.* Single photon emission computerized tomography imaging of amphetamine-induced dopamine release in drug-free schizophrenic subjects. *Proc Natl Acad Sci U S A* **93**, 9235-9240 (1996).
13. Breier, A., *et al.* Schizophrenia is associated with elevated amphetamine-induced synaptic dopamine concentrations: evidence from a novel positron emission tomography method. *Proc.Natl.Acad.Sci U.S.A* **94**, 2569-2574 (1997).
14. Abi-Dargham, A., *et al.* Increased striatal dopamine transmission in schizophrenia: confirmation in a second cohort. *Am J Psychiatry* **155**, 761-767 (1998).

The nature of dopamine dysfunction in schizophrenia and what this means for treatment. Howes OD, Kambeitz J, Kim E, Stahl D, Slifstein M, Abi-Dargham A, Kapur S. *Arch Gen Psychiatry*. 2012 Aug;69(8):776-86.

Supplementary tables 1-6.

15. Laruelle, M., Abi-Dargham, A., Gil, R., Kegeles, L. & Innis, R. Increased dopamine transmission in schizophrenia: relationship to illness phases. *Biol Psychiatry* **46**, 56-72 (1999).
16. Abi-Dargham, A., Giessen, E.V., Slifstein, M., Kegeles, L.S. & Laruelle, M. Baseline and Amphetamine-Stimulated Dopamine Activity Are Related in Drug-Naive Schizophrenic Subjects. *Biol.Psychiatry* (2009).
17. Abi-Dargham, A., *et al.* Increased baseline occupancy of D2 receptors by dopamine in schizophrenia. *Proc Natl Acad Sci U S A* **97**, 8104-8109 (2000).
18. Kegeles, L.S., *et al.* Increased synaptic dopamine function in associative regions of the striatum in schizophrenia. *Archives of general psychiatry* **67**, 231-239 (2010).
19. Arakawa, R., *et al.* Increase in thalamic binding of [(11)C]PE2I in patients with schizophrenia: a positron emission tomography study of dopamine transporter. *Journal of psychiatric research* **43**, 1219-1223 (2009).
20. Hsiao, M.C., Lin, K.J., Liu, C.Y., Tzen, K.Y. & Yen, T.C. Dopamine transporter change in drug-naive schizophrenia: an imaging study with 99mTc-TRODAT-1. *Schizophrenia research* **65**, 39-46 (2003).
21. Laakso, A., *et al.* Striatal dopamine transporter binding in neuroleptic-naive patients with schizophrenia studied with positron emission tomography. *The American journal of psychiatry* **157**, 269-271 (2000).
22. Lavalaye, J., *et al.* Dopamine transporter density in young patients with schizophrenia assessed with [123]FP-CIT SPECT. *Schizophrenia research* **47**, 59-67 (2001).
23. Laruelle, M., *et al.* Dopamine and serotonin transporters in patients with schizophrenia: an imaging study with [(123)I]beta-CIT. *Biological psychiatry* **47**, 371-379 (2000).
24. Mateos, J.J., *et al.* Decreased striatal dopamine transporter binding assessed with [123I] FP-CIT in first-episode schizophrenic patients with and without short-term antipsychotic-induced parkinsonism. *Psychopharmacology* **181**, 401-406 (2005).
25. Mateos, J.J., *et al.* Lower striatal dopamine transporter binding in neuroleptic-naive schizophrenic patients is not related to antipsychotic treatment but it suggests an illness trait. *Psychopharmacology* **191**, 805-811 (2007).
26. Yang, Y.K., *et al.* Associated alterations of striatal dopamine D2/D3 receptor and transporter binding in drug-naive patients with schizophrenia: a dual-isotope SPECT study. *The American journal of psychiatry* **161**, 1496-1498 (2004).
27. Yoder, K.K., *et al.* Dopamine transporter density in schizophrenic subjects with and without tardive dyskinesia. *Schizophrenia research* **71**, 371-375 (2004).
28. Schmitt, G.J., *et al.* Dual-isotope SPECT imaging of striatal dopamine: first episode, drug naive schizophrenic patients. *Schizophrenia research* **101**, 133-141 (2008).
29. Crawley, J.C., *et al.* Uptake of 77Br-spiperone in the striata of schizophrenic patients and controls. *Nucl.Med.Commun.* **7**, 599-607 (1986).
30. Martinot, J.L., *et al.* Striatal D2 dopaminergic receptors assessed with positron emission tomography and [76Br]bromospiperone in untreated schizophrenic patients. *The American journal of psychiatry* **147**, 44-50 (1990).

The nature of dopamine dysfunction in schizophrenia and what this means for treatment. Howes OD, Kambeitz J, Kim E, Stahl D, Slifstein M, Abi-Dargham A, Kapur S. *Arch Gen Psychiatry*. 2012 Aug;69(8):776-86.

Supplementary tables 1-6.

31. Tune, L.E., *et al.* Dopamine D2 receptor density estimates in schizophrenia: a positron emission tomography study with <sup>11</sup>C-N-methylspiperone. *Psychiatry Res.* **49**, 219-237 (1993).
32. Nordstrom, A.L., Farde, L., Eriksson, L. & Halldin, C. No elevated D2 dopamine receptors in neuroleptic-naive schizophrenic patients revealed by positron emission tomography and [<sup>11</sup>C]N-methylspiperone. *Psychiatry Res.* **61**, 67-83 (1995).
33. Okubo, Y., *et al.* Decreased prefrontal dopamine D1 receptors in schizophrenia revealed by PET. *Nature* **385**, 634-636 (1997).
34. Farde, L., *et al.* D2 dopamine receptors in neuroleptic-naive schizophrenic patients. A positron emission tomography study with [<sup>11</sup>C]raclopride. *Arch.Gen.Psychiatry* **47**, 213-219 (1990).
35. Hietala, J., *et al.* Striatal D2 dopamine receptor characteristics in neuroleptic-naive schizophrenic patients studied with positron emission tomography. *Arch.Gen.Psychiatry* **51**, 116-123 (1994).
36. Talvik, M., *et al.* Dopamine D2 receptor binding in drug-naive patients with schizophrenia examined with raclopride-C11 and positron emission tomography. *Psychiatry Res.* **148**, 165-173 (2006).
37. Pilowsky, L.S., *et al.* D2 dopamine receptor binding in the basal ganglia of antipsychotic-free schizophrenic patients. An <sup>123</sup>I-IBZM single photon emission computerised tomography study. *Br.J.Psychiatry* **164**, 16-26 (1994).
38. Pedro, B.M., *et al.* Stereotypy, schizophrenia and dopamine D2 receptor binding in the basal ganglia. *Psychological medicine* **24**, 423-429 (1994).
39. Corripio, I., *et al.* Striatal D2 receptor binding as a marker of prognosis and outcome in untreated first-episode psychosis. *Neuroimage.* **29**, 662-666 (2006).
40. Schmitt, G.J., *et al.* Increase of striatal dopamine transmission in first episode drug-naive schizophrenic patients as demonstrated by [<sup>123</sup>I]IBZM SPECT. *Psychiatry research* **173**, 183-189 (2009).
41. Kessler, R.M., *et al.* Dopamine D2 receptor levels in striatum, thalamus, substantia nigra, limbic regions, and cortex in schizophrenic subjects. *Biol.Psychiatry* **65**, 1024-1031 (2009).
42. Kegeles, L.S., *et al.* Striatal and extrastriatal dopamine D2/D3 receptors in schizophrenia evaluated with [<sup>18</sup>F]fallypride positron emission tomography. *Biological psychiatry* **68**, 634-641 (2010).
43. Martinot, J.L., *et al.* The estimated density of D2 striatal receptors in schizophrenia. A study with positron emission tomography and <sup>76</sup>Br-bromolisuride. *The British journal of psychiatry : the journal of mental science* **158**, 346-350 (1991).
44. Martinot, J.L., *et al.* Central D2 receptors and negative symptoms of schizophrenia. *The British journal of psychiatry : the journal of mental science* **164**, 27-34 (1994).
45. Andreasen, N.C., *et al.* Workshop on schizophrenia, PET, and dopamine D2 receptors in the human neostriatum. *Schizophrenia bulletin* **14**, 471-484 (1988).
